# Supplementary material
Source: PubMed Central journal article supplement (PMC3426623)
Supplement: NIHMS363187-supplement-Supplementary_Data.pdf [file NIHMS363187-supplement-Supplementary_Data.pdf]

## SUPPLEMENTARY MATERIAL

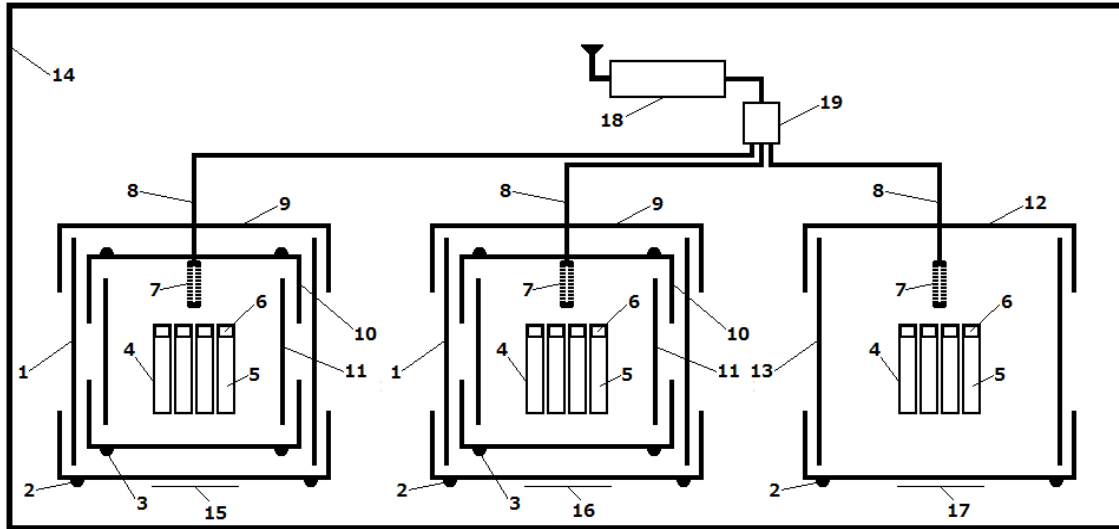

**Figure A:** Exposure System Diagram (BMF containers; Side View). 1: External Container, 2 & 3: Rubber Separators, 4: *D. melanogaster* Vials & Bottles, 5: *D. melanogaster*, 6: Cotton or Cardboard, 7: Diffuser Stone, 8: Air Hose, 9: External Circular Lid, 10: Internal Circular Lid, 11: Internal Container, 12: Plastic Circular Lid, 13: Cardboard Container, 14: Incubator, 15:  $\mu$ -Metal Cylindrical Container, 16: Stainless Steel Cylindrical Container, 17: Plastic And Cardboard Cylindrical Container, 18: Air Pump, 19: Air Regulator.

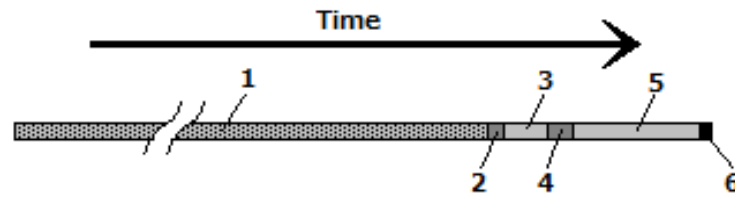

**Figure B:** Timeline of the *D. melanogaster* exposure to different BMF environments and IR. **1: Stock life**—Flies spent 12 to 18 months inside 177 ml polypropylene bottles that were inside the BMF containers ( $\mu$ -metal, plastic and cardboard). During this time, the bottles were removed from the BMF containers and put onto the laboratory bench's BMF periodically (every 5-7 days) for only 20 min to renew the cornmeal-agar preparation; **2: Collection**—Adult flies were put in a new 177 ml polypropylene bottle with renewed cornmeal-agar preparation in order to stimulate egg deposition. The cornmeal-agar preparation was sprinkled with yeast to ferment the preparation, making it attractive to flies. After 5 h, adult flies were removed from these new bottles and returned to the old stock bottles, each of these still remaining in its respective BMF container; **3: Feeding stage**—The new bottles with eggs were left inside the different BMF containers for 5 days. This was enough time for larvae to age to feeding 3<sup>rd</sup> instar stage; **4: Sorting and IR exposure**—The contents of each bottle (cornmeal-agar preparation + *D. melanogaster* larvae) were scooped out and divided among 6 transparent plastic vials. Subsequently, each of the vials was exposed to a different IR doses (0, 20, 40, 60, 80 or 100 Gy). The total time for this step (sorting and IR exposure) took between 34-94 min, depending on the IR dose. During this time, *D. melanogaster* was exposed to the BMF present in the lab bench and in the X-ray generator; **5: Post-IR exposure**—After IR exposure the vials were again placed in their corresponding BMF container and remained there for 7 days. After 7 days in the BMF containers, larvae should have crawled out of the cornmeal-agar preparation into the walls of the container, encapsulated into a pupal case, undergone metamorphosis, and then emerge from their pupal case into fully matured/viable adults (eclosed; all this under normal environmental conditions); **6: Freezing**—At day 7 the vials were frozen to halt development and allow for storage until the vials could be closely examined for detecting the number of eclosed vs. non-eclosed flies.

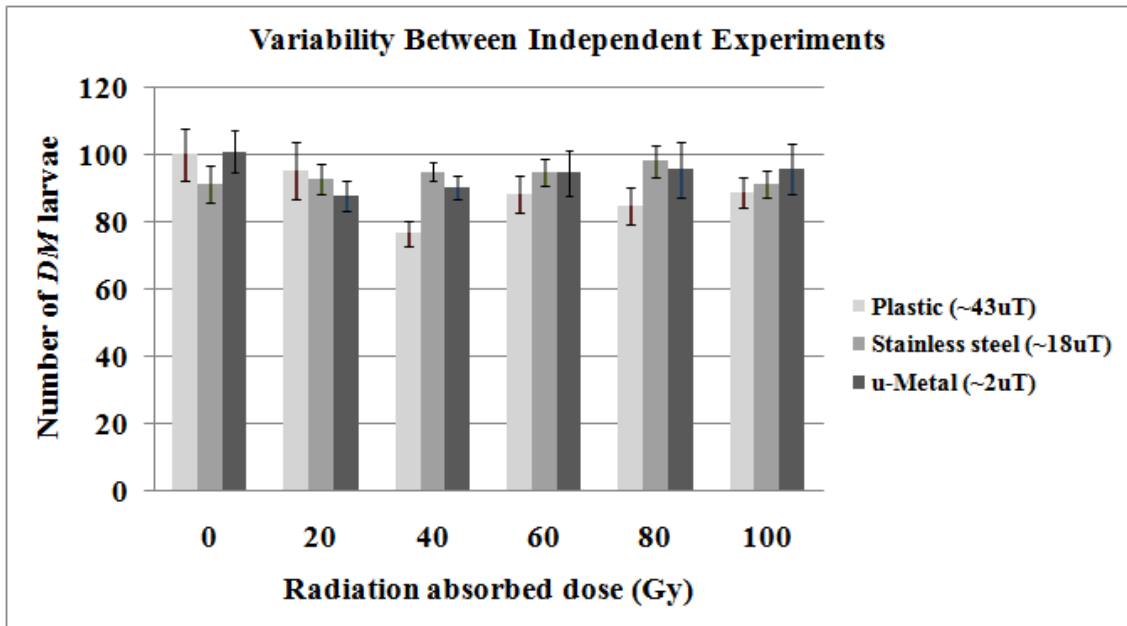

**Figure C:** Numbers of *D. melanogaster* pupae in each vial were between 50 and 155 pupae. The error bar length represents one standard error.

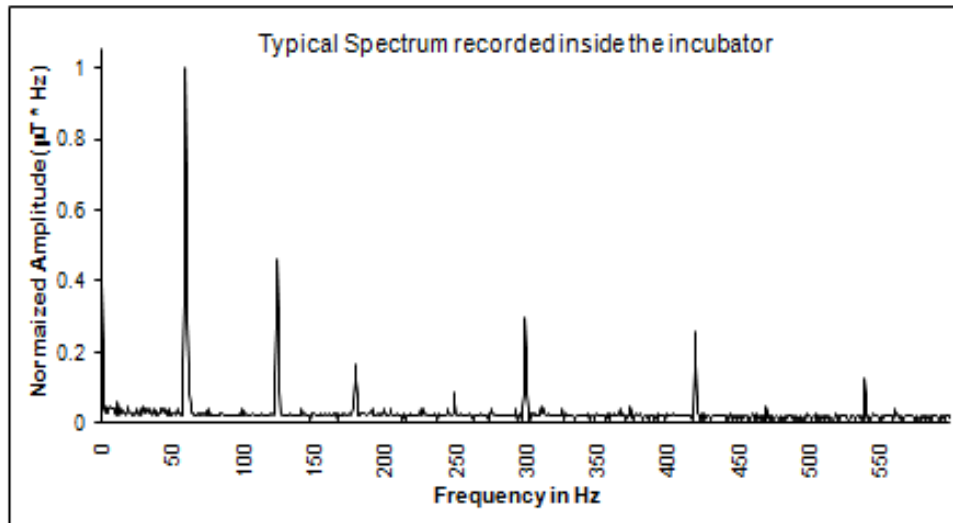

**Figure D:** Spectrums recorded for the different exposure systems. The incubator and X-ray generator (off) had the same general form: a 60 Hz main frequency and its harmonics. The harmonic amplitudes were always of lower magnitude than that of the 60 Hz. In this representation, the vertical scale is in  $\mu\text{T} \cdot \text{Hz}$  to facilitate the observation of the harmonics.

| Radiation Dose |           |      |       |     |        |                |        |                |
|----------------|-----------|------|-------|-----|--------|----------------|--------|----------------|
| mGy/sec        | (Rad/sec) | TES  | TEM   | TER | Rads   | Rads (rounded) | Gy     | Rads (rounded) |
| 24             | 2.4       | 833  | 13.88 | 14  | 1999.2 | 2000           | 19.992 | 20             |
| 24             | 2.4       | 1667 | 27.78 | 28  | 4000.8 | 4000           | 40.008 | 40             |
| 24             | 2.4       | 2500 | 41.67 | 42  | 6000   | 6000           | 60     | 60             |
| 24             | 2.4       | 3333 | 55.55 | 56  | 7999.2 | 8000           | 79.992 | 80             |
| 24             | 2.4       | 4166 | 69.43 | 70  | 9998.4 | 10000          | 99.984 | 100            |

**Table A:** IR dose and calculation of exposure time. TES = Time of exposure (s); TEM = Time of exposure (min); TER = Time of exposure (min)-rounded up.

|               |                           | SSN             |                 | SSP             |                 |
|---------------|---------------------------|-----------------|-----------------|-----------------|-----------------|
|               |                           | TTT             | OWA             | TTT             | OWA             |
| <b>100 Gy</b> | u-metal & plastic         | <b>1.14E-12</b> |                 | <b>7.14E-09</b> |                 |
|               | plastic & stainless steel | 7.55E-01        | <b>4.10E-05</b> | 7.02E-01        | <b>1.04E-06</b> |
|               | u-metal & stainless steel | <b>2.43E-06</b> |                 | <b>3.89E-04</b> |                 |
| <b>80 Gy</b>  | u-metal & plastic         | <b>7.12E-07</b> |                 | <b>2.63E-05</b> |                 |
|               | plastic & stainless steel | 6.26E-01        | <b>2.11E-03</b> | 1.65E-01        | <b>4.43E-05</b> |
|               | u-metal & stainless steel | <b>2.15E-05</b> |                 | <b>1.55E-03</b> |                 |
| <b>60 Gy</b>  | u-metal & plastic         | <b>6.63E-03</b> |                 | <b>2.16E-02</b> |                 |
|               | plastic & stainless steel | 3.60E-01        | <b>4.98E-02</b> | 8.27E-01        | <b>3.55E-02</b> |
|               | u-metal & stainless steel | <b>2.46E-03</b> |                 | <b>3.16E-02</b> |                 |
| <b>40 Gy</b>  | u-metal & plastic         | 2.91E-01        |                 | <b>1.04E-02</b> |                 |
|               | plastic & stainless steel | 3.45E-01        | 7.20E-01        | <b>2.40E-02</b> | 8.48E-02        |
|               | u-metal & stainless steel | 7.88E-01        |                 | 7.17E-01        |                 |
| <b>20 Gy</b>  | u-metal & plastic         | 5.78E-01        |                 | 2.68E-01        |                 |
|               | plastic & stainless steel | 7.92E-01        | 7.56E-01        | 8.79E-01        | 4.06E-01        |
|               | u-metal & stainless steel | 6.63E-01        |                 | 1.83E-01        |                 |
| <b>0 Gy</b>   | u-metal & plastic         | 7.17E-01        |                 | <b>7.98E-03</b> |                 |
|               | plastic & stainless steel | 2.23E-01        | 4.86E-01        | 1.15E-02        | <b>1.19E-02</b> |
|               | u-metal & stainless steel | 2.93E-01        |                 | 6.63E-01        |                 |

**Table B:** Two-tailed t-test results for 80 and 100 Gy. Asterisk (\*) denotes significance (p-value < 0.01). The difference between the  $\mu$ -metal container (1.70  $\mu$ T) and the rest of the containers tested was statistically significant. SSN = Statistical analysis on raw survival numbers (p-value); SSP = Statistical analysis on raw survival percentages (p-value); TTT = Two-tailed t-test; OWA = One-way ANOVA.

| Environment Tested | CPM |
|--------------------|-----|
| u-metal            | <50 |
| stainless steel    | <50 |
| plastic            | <50 |
| room/lab bench     | <50 |

**Table C:** Background/ambient IR measurements

| keV   | nickel<br>cm <sup>2</sup> /g | Iron<br>cm <sup>2</sup> /g | Chromium<br>cm <sup>2</sup> /g | Difference between nickel and iron (percentage) | Difference between nickel and iron (percentage) |
|-------|------------------------------|----------------------------|--------------------------------|-------------------------------------------------|-------------------------------------------------|
| 100   | 4.44E-01                     | 3.72E-01                   | 3.17E-01                       | 17.40%                                          | 19.45%                                          |
| 150   | 2.21E-01                     | 1.96E-01                   | 1.79E-01                       | 9.84%                                           | 12.42%                                          |
| 200   | 1.58E-01                     | 1.46E-01                   | 1.38E-01                       | 5.95%                                           | 8.36%                                           |
| 300   | 1.15E-01                     | 1.10E-01                   | 1.07E-01                       | 3.00%                                           | 5.00%                                           |
| 400   | 9.77E-02                     | 9.40E-02                   | 9.21E-02                       | 2.03%                                           | 3.88%                                           |
| 500   | 8.70E-02                     | 8.41E-02                   | 8.28E-02                       | 1.61%                                           | 3.38%                                           |
| 600   | 7.94E-02                     | 7.70E-02                   | 7.60E-02                       | 1.40%                                           | 3.12%                                           |
| 800   | 6.89E-02                     | 6.70E-02                   | 6.62E-02                       | 1.19%                                           | 2.87%                                           |
| 1000  | 6.16E-02                     | 6.00E-02                   | 5.93E-02                       | 1.10%                                           | 2.75%                                           |
| 1250  | 5.49E-02                     | 5.35E-02                   | 5.30E-02                       | 1.04%                                           | 2.69%                                           |
| 1500  | 5.02E-02                     | 4.88E-02                   | 4.83E-02                       | 1.06%                                           | 2.70%                                           |
| 2000  | 4.39E-02                     | 4.27E-02                   | 4.21E-02                       | 1.23%                                           | 2.86%                                           |
| 3000  | 3.75E-02                     | 3.62E-02                   | 3.56E-02                       | 1.74%                                           | 3.42%                                           |
| 4000  | 3.44E-02                     | 3.31E-02                   | 3.24E-02                       | 2.38%                                           | 3.99%                                           |
| 5000  | 3.29E-02                     | 3.15E-02                   | 3.06E-02                       | 2.91%                                           | 4.55%                                           |
| 6000  | 3.21E-02                     | 3.06E-02                   | 2.96E-02                       | 3.42%                                           | 5.00%                                           |
| 8000  | 3.16E-02                     | 2.99E-02                   | 2.87E-02                       | 4.25%                                           | 5.78%                                           |
| 10000 | 3.19E-02                     | 2.99E-02                   | 2.86E-02                       | 4.87%                                           | 6.38%                                           |
| 15000 | 3.32E-02                     | 3.09E-02                   | 2.92E-02                       | 5.89%                                           | 7.37%                                           |
| 20000 | 3.48E-02                     | 3.22E-02                   | 3.03E-02                       | 6.54%                                           | 7.82%                                           |

**Table D:** Mass attenuation coefficients for elements forming the containers, obtained from <http://physics.nist.gov/PhysRefData/XrayMassCoef/tab3.html>



| <b>u-Metal</b> |        |       |      |        |                         |       |      |        |                        |       |      |
|----------------|--------|-------|------|--------|-------------------------|-------|------|--------|------------------------|-------|------|
| Gy             | #      | SD    | SE   | COV    | Mean of surviving flies | SD    | SE   | COV    | Percentage of Survival | SD    | SE   |
| 0              | 100.90 | 19.29 | 6.10 | 19.12% | 96.4                    | 17.31 | 5.47 | 17.96% | 95.54                  | 2.01  | 0.64 |
| 20             | 87.70  | 13.64 | 4.31 | 15.55% | 81.3                    | 13.32 | 4.21 | 16.38% | 92.70                  | 1.15  | 0.36 |
| 40             | 90.30  | 11.40 | 3.61 | 12.63% | 70.6                    | 8.86  | 2.80 | 12.55% | 78.18                  | 5.24  | 1.66 |
| 60             | 94.50  | 21.16 | 6.69 | 22.39% | 49.2                    | 8.72  | 2.76 | 17.71% | 52.06                  | 10.97 | 3.47 |
| 80             | 95.50  | 25.92 | 8.20 | 27.14% | 31.9                    | 9.01  | 2.85 | 28.25% | 33.40                  | 9.33  | 2.95 |
| 100            | 95.60  | 23.86 | 7.54 | 24.96% | 15.5                    | 4.09  | 1.29 | 26.38% | 16.21                  | 4.33  | 1.37 |

| <b>Plastic</b> |        |       |      |        |                         |       |      |        |                        |       |      |
|----------------|--------|-------|------|--------|-------------------------|-------|------|--------|------------------------|-------|------|
| Gy             | #      | SD    | SE   | COV    | Mean of surviving flies | SD    | SE   | COV    | Percentage of Survival | SD    | SE   |
| 0              | 100.00 | 25.13 | 7.95 | 25.13% | 97.9                    | 24.53 | 7.76 | 25.06% | 97.90                  | 0.83  | 0.26 |
| 20             | 95.10  | 26.46 | 8.37 | 27.82% | 87.3                    | 25.18 | 7.96 | 28.84% | 91.80                  | 2.21  | 0.70 |
| 40             | 76.50  | 10.60 | 3.75 | 13.86% | 77.4                    | 9.09  | 3.21 | 11.74% | 83.95                  | 2.48  | 0.88 |
| 60             | 88.20  | 16.81 | 5.32 | 19.06% | 56.7                    | 9.68  | 3.06 | 17.08% | 64.29                  | 10.05 | 3.18 |
| 80             | 84.70  | 17.95 | 5.68 | 21.19% | 49.6                    | 11.45 | 3.62 | 23.09% | 58.56                  | 10.16 | 3.21 |
| 100            | 88.70  | 14.36 | 4.54 | 16.19% | 37.4                    | 7.95  | 2.51 | 21.25% | 42.16                  | 6.02  | 1.90 |

| <b>Stainless steel</b> |       |       |      |        |                         |       |      |        |                        |       |      |
|------------------------|-------|-------|------|--------|-------------------------|-------|------|--------|------------------------|-------|------|
| Gy                     | #     | SD    | SE   | COV    | Mean of surviving flies | SD    | SE   | COV    | Percentage of Survival | SD    | SE   |
| 0                      | 91.20 | 17.20 | 5.44 | 18.86% | 87.8                    | 17.30 | 5.47 | 19.70% | 96.27                  | 1.76  | 0.56 |
| 20                     | 92.90 | 14.11 | 4.46 | 15.18% | 85                      | 12.62 | 3.99 | 14.85% | 91.50                  | 2.10  | 0.66 |
| 40                     | 94.80 | 8.40  | 2.66 | 8.86%  | 73                      | 6.51  | 2.06 | 8.92%  | 77.00                  | 7.59  | 2.40 |
| 60                     | 94.80 | 12.22 | 3.86 | 12.89% | 63.1                    | 16.20 | 5.12 | 25.68% | 66.56                  | 13.77 | 4.36 |
| 80                     | 98.00 | 15.56 | 4.92 | 15.87% | 51.7                    | 15.56 | 4.92 | 30.09% | 52.76                  | 11.38 | 3.60 |
| 100                    | 91.20 | 12.53 | 3.96 | 13.74% | 37.3                    | 15.42 | 4.88 | 41.34% | 40.90                  | 13.99 | 4.42 |

**Table E:** Variability in the data. # = Mean of total (total # of flies in vial (dead (non-eclosed) + alive (eclosed))).

| EXPERIMENT # | 1         |     | 2     |     | 3     |     | 4     |    | 5     |     | 6     |    | 7     |    | 8     |     | 9     |     | 10    |    |       |
|--------------|-----------|-----|-------|-----|-------|-----|-------|----|-------|-----|-------|----|-------|----|-------|-----|-------|-----|-------|----|-------|
|              | #         | %   | #     | %   | #     | %   | #     | %  | #     | %   | #     | %  | #     | %  | #     | %   | #     | %   | #     | %  |       |
| 100 Gy       | mu metal  | 9   | 6.34  | 17  | 21.11 | 21  | 20.39 | 10 | 18.52 | 18  | 18.56 | 14 | 18.42 | 19 | 15.04 | 16  | 14.81 | 12  | 15.38 | 19 | 20.00 |
|              | plastic   | 32  | 33.33 | 34  | 51.19 | 29  | 37.18 | 37 | 34.58 | 48  | 48.48 | 29 | 43.94 | 43 | 39.08 | 52  | 46.85 | 38  | 45.24 | 32 | 42.67 |
|              | stainless | 19  | 20.21 | 22  | 50.96 | 17  | 23.94 | 30 | 30.61 | 65  | 57.52 | 40 | 53.33 | 53 | 24.72 | 44  | 51.16 | 43  | 45.74 | 40 | 45.45 |
| 80 Gy        | mu metal  | 16  | 10.60 | 39  | 34.57 | 42  | 45.16 | 24 | 35.29 | 42  | 38.89 | 24 | 34.29 | 28 | 32.50 | 41  | 39.42 | 31  | 40.79 | 32 | 38.10 |
|              | plastic   | 44  | 46.32 | 45  | 70.13 | 48  | 44.86 | 49 | 52.69 | 75  | 71.43 | 31 | 64.58 | 54 | 48.91 | 58  | 67.44 | 49  | 64.47 | 43 | 63.24 |
|              | stainless | 40  | 37.04 | 38  | 65.31 | 29  | 43.94 | 42 | 41.18 | 79  | 65.29 | 70 | 62.50 | 64 | 38.38 | 52  | 61.90 | 49  | 55.68 | 54 | 52.94 |
| 60 Gy        | mu metal  | 46  | 32.86 | 44  | 75.95 | 41  | 56.94 | 36 | 48.00 | 65  | 55.08 | 51 | 51.52 | 60 | 44.90 | 53  | 57.61 | 51  | 54.84 | 45 | 56.96 |
|              | plastic   | 43  | 48.31 | 66  | 74.14 | 65  | 59.09 | 52 | 51.49 | 68  | 74.73 | 54 | 79.41 | 43 | 64.08 | 65  | 69.15 | 49  | 68.06 | 62 | 64.58 |
|              | stainless | 39  | 39.00 | 66  | 75.25 | 52  | 68.42 | 40 | 45.45 | 91  | 77.78 | 61 | 79.22 | 76 | 68.75 | 74  | 77.89 | 70  | 67.96 | 62 | 65.26 |
| 40 Gy        | mu metal  | 64  | 66.67 | 67  | 82.35 | 57  | 83.82 | 66 | 78.57 | 88  | 79.28 | 66 | 78.57 | 70 | 72.04 | 80  | 81.63 | 72  | 81.82 | 76 | 79.17 |
|              | plastic   | 144 | 75.39 | 82  | 81.82 | 91  | 86.67 | 64 | 82.05 | 78  | 82.98 | 67 | 88.16 | 18 | 83.67 | 69  | 82.14 | 80  | 85.11 | 81 | 81.00 |
|              | stainless | 58  | 69.05 | 72  | 83.16 | 69  | 66.99 | 75 | 68.81 | 74  | 88.10 | 78 | 86.67 | 79 | 72.73 | 80  | 80.00 | 76  | 78.35 | 69 | 79.31 |
| 20 Gy        | mu metal  | 83  | 92.22 | 70  | 92.31 | 80  | 93.02 | 60 | 92.31 | 109 | 94.78 | 73 | 93.59 | 84 | 90.91 | 81  | 91.01 | 79  | 92.94 | 94 | 93.07 |
|              | plastic   | 146 | 94.19 | 110 | 89.77 | 79  | 88.76 | 81 | 88.04 | 73  | 94.81 | 51 | 92.73 | 79 | 91.67 | 88  | 92.63 | 85  | 92.39 | 81 | 92.05 |
|              | stainless | 57  | 91.94 | 96  | 93.33 | 72  | 90.00 | 98 | 88.29 | 89  | 88.12 | 82 | 93.18 | 84 | 92.31 | 93  | 93.94 | 95  | 93.14 | 84 | 91.30 |
| 0 Gy         | mu metal  | 124 | 91.18 | 101 | 97.89 | 76  | 96.20 | 67 | 95.71 | 117 | 97.50 | 86 | 96.63 | 93 | 93.52 | 105 | 95.45 | 100 | 97.09 | 95 | 95.96 |
|              | plastic   | 150 | 98.04 | 108 | 97.47 | 119 | 96.75 | 95 | 97.94 | 87  | 98.86 | 60 | 96.77 | 77 | 97.30 | 101 | 98.06 | 96  | 98.97 | 86 | 98.85 |
|              | stainless | 102 | 94.44 | 76  | 96.59 | 50  | 92.59 | 94 | 94.95 | 102 | 97.14 | 91 | 96.81 | 85 | 96.20 | 74  | 96.10 | 108 | 99.08 | 96 | 96.97 |

**Table F:** Raw data. # = Number of flies that survived (eclosed); % = Percentage of flies that survived (eclosed), with respect to total number of flies in each vial (eclosed + non-eclosed).
